# Supplementary material for: Scheelite-related MIIxBi1−xV1−xMoxO4(MII– Ca, Sr) solid solution-based photoanodes for enhanced photoelectrochemical water oxidation
Source: Royal Society of Chemistry journal article supplement (doi:10.1039/c9dt04417e), 2020-01-01
Supplement: c9dt04417e1.pdf [file c9dt04417e1.pdf]

## Scheelite-related $M^{II}_xBi_{1-x}V_{1-x}Mo_xO_4$ ( $M^{II}$ – Ca, Sr) Solid Solutions Based Photoanodes for Enhanced Photoelectrochemical Water Oxidation

Shilin Li,<sup>‡a</sup> Konstantin L. Bychkov,<sup>‡b</sup> Denys S. Butenko,<sup>a</sup> Kateryna V. Terebilenko,<sup>\*b</sup> Yukun Zhu,<sup>c</sup> Wei Han,<sup>a,d</sup> Vyacheslav N. Baumer<sup>e</sup>, Mykola S.Slobodyanik<sup>b</sup>, Hong Ji<sup>\*f</sup> and N.I. Klyui<sup>\*f,g</sup>

---

<sup>a.</sup> *Sino-Russian International Joint Laboratory for Clean Energy and Energy Conversion Technology, College of Physics, Jilin University, Changchun 130012, P. R. China.*

<sup>b.</sup> *Department of Chemistry, Taras Shevchenko National University of Kyiv, Volodymyrska st, 64/13, 01601, Kyiv, Ukraine.*

<sup>c.</sup> *State Key Laboratory of Bio-fibers and Eco-textiles, School of Environmental Science and Engineering, Qingdao University, Qingdao 266071, China.*

<sup>d.</sup> *International Center of Future Science, Jilin University, Changchun City 130012, China.*

<sup>e.</sup> *STC “Institute for Single Crystals” NAS of Ukraine, 60 Nauky ave., 61001 Kharkiv, Ukraine.*

<sup>f.</sup> *College of Physics, Jilin University, 2699 Qianjin st., 130012 Changchun, China.*

<sup>g.</sup> *V. Lashkaryov Institute of Semiconductor Physics, NAS of Ukraine, 41 pr. Nauki, 03028 Kyiv, Ukraine.*

<sup>‡</sup> The authors contributed equally to this work.

---

Email: kterebylenko@gmail.com (Kateryna V. Terebilenko\*); jih@jlu.edu.cn (Hong Ji\*); klyuini@ukr.net (N.I. Klyui\*)

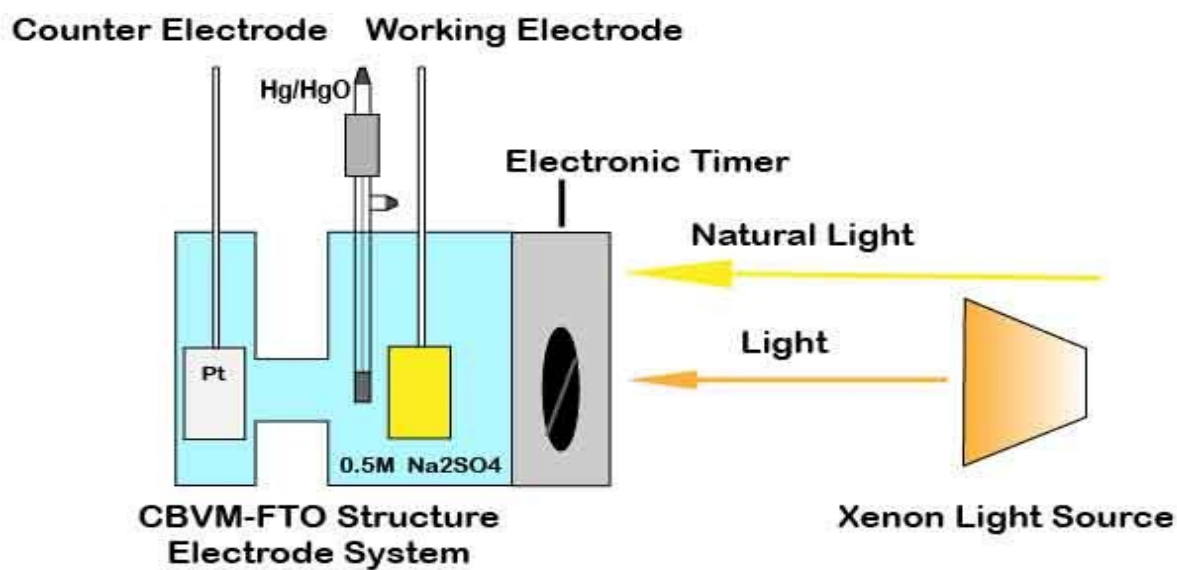

Fig. S1 Experiment Apparatus

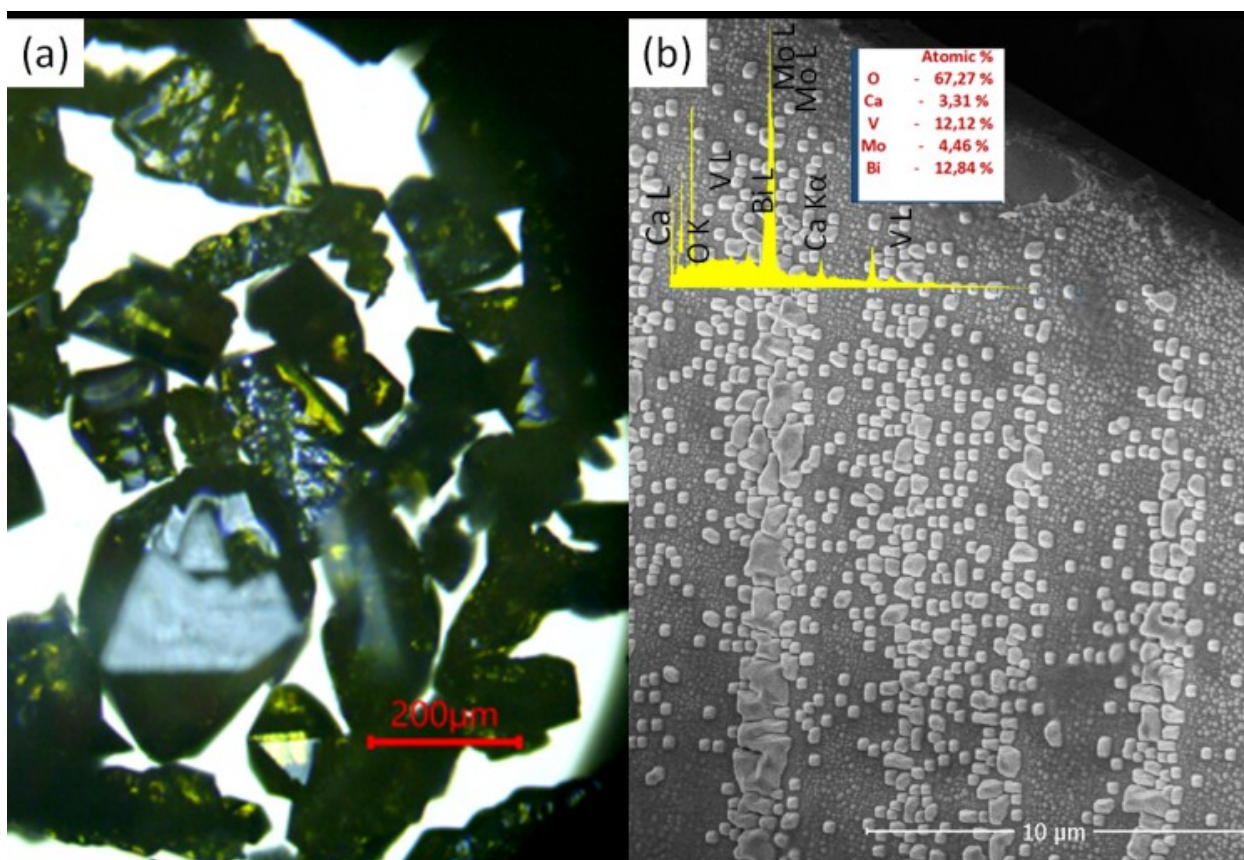

Fig. S2 Single crystals of  $\text{Ca}_{0.126}\text{Bi}_{0.874}\text{V}_{0.874}\text{Mo}_{0.126}\text{O}_4$  photo (a) and SEM image of surfaces (insert is the associated EDS).

**Table S1** Structural details for single-crystal  $\text{Bi}_{0.874}\text{Ca}_{0.126}\text{V}_{0.874}\text{Mo}_{0.126}\text{O}_4$  and powdered  $\text{Bi}_{0.5}\text{Sr}_{0.5}\text{V}_{0.5}\text{Mo}_{0.5}\text{O}_4$

| <b>Crystal data</b>                                                     |                                                                                 |                                                                         |
|-------------------------------------------------------------------------|---------------------------------------------------------------------------------|-------------------------------------------------------------------------|
| Formula                                                                 | $\text{Bi}_{0.874}\text{Ca}_{0.126}\text{V}_{0.874}\text{Mo}_{0.126}\text{O}_4$ | $\text{Bi}_{0.5}\text{Sr}_{0.5}\text{V}_{0.5}\text{Mo}_{0.5}\text{O}_4$ |
| Formula weight                                                          | 308.3                                                                           | 285.74                                                                  |
| Crystal system                                                          | Tetragonal                                                                      | Tetragonal                                                              |
| Space group                                                             | $I4_1$ (N80)                                                                    | $I4_1/a$ (N88)                                                          |
| a, Å                                                                    | 5.1519(4)                                                                       | 5.26909(8)                                                              |
| c, Å                                                                    | 11.6330(8)                                                                      | 11.89254(19)                                                            |
| V, Å <sup>3</sup>                                                       | 308.76(4)                                                                       | 330.177(9)                                                              |
| Formula units, Z                                                        | 4                                                                               | 4                                                                       |
| Radiation type                                                          | Mo $K\alpha$ ( $\lambda = 0.71073$ Å)                                           | Cu $K\alpha$ ( $\lambda = 1.540598$ Å)                                  |
| $D_x$ (Mg m <sup>-3</sup> )                                             | 6.632                                                                           |                                                                         |
| $F(000)$                                                                | 530                                                                             |                                                                         |
| $\mu$ (mm <sup>-1</sup> )                                               | 52.95                                                                           |                                                                         |
| Temperature (K)                                                         | 293                                                                             | 293                                                                     |
| <b>Data collection</b>                                                  |                                                                                 |                                                                         |
| Diffractometer                                                          | Oxford Xcalibur-3 CCD area-detector                                             | Shimadzu LabX XRD-6000                                                  |
| Scan                                                                    | $\varphi$ and $\omega$                                                          | $2\theta_{\text{step}} = 0.02^\circ$                                    |
| Absorption correction:                                                  | multi-scan (Blessing, 1995)                                                     |                                                                         |
| $T_{\text{min}}, T_{\text{max}} = 1$                                    | 0.289, 1                                                                        |                                                                         |
| Measured reflections                                                    | 2400                                                                            |                                                                         |
| Independent reflections                                                 | 579                                                                             |                                                                         |
| Reflections with $I > 2\sigma(I)$                                       | 489                                                                             |                                                                         |
| $R_{\text{int}}$                                                        | 0.070                                                                           |                                                                         |
| $\theta_{\text{min}}$                                                   | $36.2^\circ$                                                                    | $2\theta_{\text{min}} = 10.041^\circ$                                   |
| $\theta_{\text{max}}$                                                   | $4.3^\circ$                                                                     | $2\theta_{\text{max}} = 105.061^\circ$                                  |
| $h, k, l$                                                               | $-8 \rightarrow 7, -7 \rightarrow 8, -11 \rightarrow 19$                        |                                                                         |
| <b>Refinement</b>                                                       |                                                                                 |                                                                         |
| Refinement on $F^2$ $R[F^2 > 2\sigma(F^2)]$                             | 0.054                                                                           |                                                                         |
| $wR(F^2)$                                                               | 0.123                                                                           |                                                                         |
| $S$                                                                     | 1.90                                                                            |                                                                         |
| Reflections                                                             | 579                                                                             |                                                                         |
| Parameters                                                              | 30                                                                              | 34                                                                      |
| $\Delta\rho_{\text{max}}, \Delta\rho_{\text{min}}$ (e·Å <sup>-3</sup> ) | 2.69, -5.44                                                                     |                                                                         |
| Friedel pairs                                                           | 197                                                                             |                                                                         |
| $R_p$                                                                   |                                                                                 | 9.660                                                                   |
| $R_{\text{wp}}$                                                         |                                                                                 | 12.993                                                                  |
| $R_{\text{exp}}$                                                        |                                                                                 | 4.474                                                                   |

**Table S2.** Atomic coordinates for  $\text{Bi}_{0.874}\text{Ca}_{0.126}\text{V}_{0.874}\text{Mo}_{0.126}\text{O}_4$  and  $\text{Bi}_{0.5}\text{Sr}_{0.5}\text{V}_{0.5}\text{Mo}_{0.5}\text{O}_4$

| <i>Atom</i>                                                                                       | <i>Site</i> | <i>Occ.</i>     | <i>x</i>    | <i>y</i>    | <i>z</i>   |
|---------------------------------------------------------------------------------------------------|-------------|-----------------|-------------|-------------|------------|
| <b><math>\text{Bi}_{0.874}\text{Ca}_{0.126}\text{V}_{0.874}\text{Mo}_{0.126}\text{O}_4</math></b> |             |                 |             |             |            |
| Bi1                                                                                               | <i>4a</i>   | <i>0.874(7)</i> | 0.5         | 0.5         | 0.1248(3)  |
| Ca1                                                                                               | <i>4a</i>   | <i>0.126(7)</i> | 0.5         | 0.5         | 0.1248(3)  |
| V1                                                                                                | <i>4a</i>   | <i>0.874(7)</i> | 1           | 0           | 0.1267(9)  |
| Mo1                                                                                               | <i>4a</i>   | <i>0.126(7)</i> | 1           | 0           | 0.1267(9)  |
| O1                                                                                                | <i>8b</i>   | <i>1</i>        | 0.8504(19)  | 0.250(3)    | 0.0438(18) |
| O2                                                                                                | <i>8b</i>   | <i>1</i>        | 0.245(3)    | 0.131(2)    | 0.2027(19) |
| <b><math>\text{Bi}_{0.5}\text{Sr}_{0.5}\text{V}_{0.5}\text{Mo}_{0.5}\text{O}_4</math></b>         |             |                 |             |             |            |
| Bi1                                                                                               | <i>4a</i>   | <i>0.5</i>      | 0           | 0.25        | 0.625      |
| Ca1                                                                                               | <i>4a</i>   | <i>0.5</i>      | 0           | 0.25        | 0.625      |
| V1                                                                                                | <i>4a</i>   | <i>0.5</i>      | -0.5        | -0.25       | 0.625      |
| Mo1                                                                                               | <i>4a</i>   | <i>0.5</i>      | -0.5        | -0.25       | 0.625      |
| O1                                                                                                | <i>16f</i>  | <i>1</i>        | -0.7479(13) | -0.3743(14) | 0.5418(6)  |

**Table S3** The EDS data for  $M^{II}_{1-x}Bi_xV_xMo_{1-x}O_4$  (x =0-1) Solid Solutions

| <b>BiVO<sub>4</sub></b> |       |       |            |       |
|-------------------------|-------|-------|------------|-------|
|                         | Found |       | Calculated |       |
|                         | Wt. % | At. % | Wt. %      | At. % |
| <b>Bi</b>               | 65.50 | 17.7  | 64.51      | 16.67 |
| <b>V</b>                | 16.34 | 18.1  | 15.73      | 16.67 |
| <b>O</b>                | 18.17 | 64.2  | 19.76      | 66.66 |

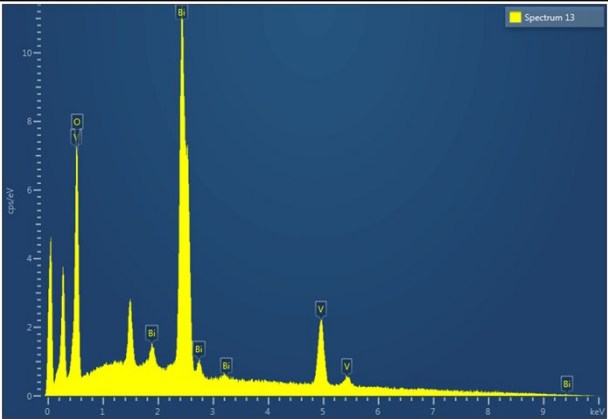
  

| <b>CBVM1</b> |       |       |            |       |
|--------------|-------|-------|------------|-------|
|              | Found |       | Calculated |       |
|              | Wt. % | At. % | Wt. %      | At. % |
| <b>Bi</b>    | 61.20 | 15.9  | 60.37      | 15.0  |
| <b>Mo</b>    | 3.73  | 2.1   | 3.08       | 1.67  |
| <b>V</b>     | 15.21 | 16.2  | 14.72      | 15.0  |
| <b>Ca</b>    | 0.81  | 1.1   | 1.29       | 1.67  |
| <b>O</b>     | 19.05 | 64.7  | 20.54      | 66.66 |


  

| <b>SBVM1</b> |       |       |            |       |
|--------------|-------|-------|------------|-------|
|              | Found |       | Calculated |       |
|              | Wt. % | At. % | Wt. %      | At. % |
| <b>Bi</b>    | 60.55 | 16.1  | 59.47      | 15.0  |
| <b>Mo</b>    | 3.97  | 2.3   | 3.03       | 1.67  |
| <b>V</b>     | 14.97 | 16.3  | 15.0       | 15.0  |
| <b>Sr</b>    | 2.08  | 1.3   | 2.77       | 1.67  |
| <b>O</b>     | 18.43 | 64.0  | 20.23      | 66.66 |


  

| <b>CBVM2</b> |       |       |            |       |
|--------------|-------|-------|------------|-------|
|              | Found |       | Calculated |       |
|              | Wt. % | At. % | Wt. %      | At. % |
| <b>Bi</b>    | 59.65 | 15.7  | 55.89      | 13.33 |
| <b>Mo</b>    | 5.99  | 3.4   | 6.42       | 3.34  |
| <b>V</b>     | 14.74 | 15.9  | 13.62      | 13.33 |
| <b>Ca</b>    | 1.18  | 1.6   | 2.68       | 3.34  |
| <b>O</b>     | 18.44 | 63.4  | 21.39      | 66.66 |



| <b>SBVM2</b> |              |              |              |              |
|--------------|--------------|--------------|--------------|--------------|
|              | Found        |              | Calculated   |              |
|              | <i>Wt. %</i> | <i>At. %</i> | <i>Wt. %</i> | <i>At. %</i> |
| <b>Bi</b>    | 57.70        | 15.3         | 54.17        | 13.33        |
| <b>Mo</b>    | 5.05         | 2.9          | 6.22         | 3.34         |
| <b>V</b>     | 14.43        | 15.7         | 13.20        | 13.33        |
| <b>Sr</b>    | 4.58         | 2.9          | 5.68         | 3.34         |
| <b>O</b>     | 18.24        | 63.2         | 20.73        | 66.66        |

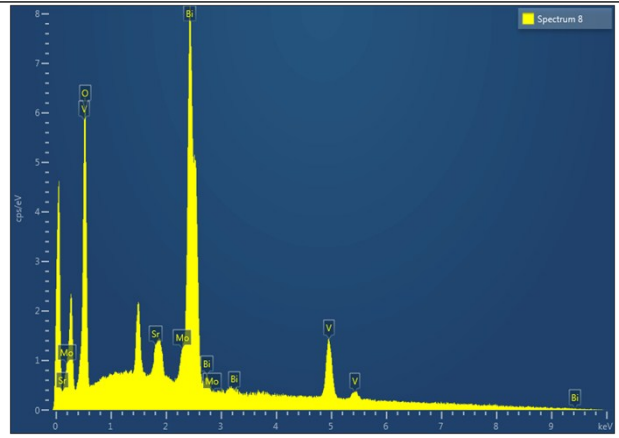

| <b>CBVM3</b> |              |              |              |              |
|--------------|--------------|--------------|--------------|--------------|
|              | Found        |              | Calculated   |              |
|              | <i>Wt. %</i> | <i>At. %</i> | <i>Wt. %</i> | <i>At. %</i> |
| <b>Bi</b>    | 57.76        | 14.9         | 51.01        | 11.67        |
| <b>Mo</b>    | 8.42         | 4.7          | 10.04        | 5.0          |
| <b>V</b>     | 11.00        | 12.7         | 12.44        | 11.67        |
| <b>Ca</b>    | 2.93         | 3.9          | 4.19         | 5.0          |
| <b>O</b>     | 18.89        | 63.8         | 22.32        | 66.66        |

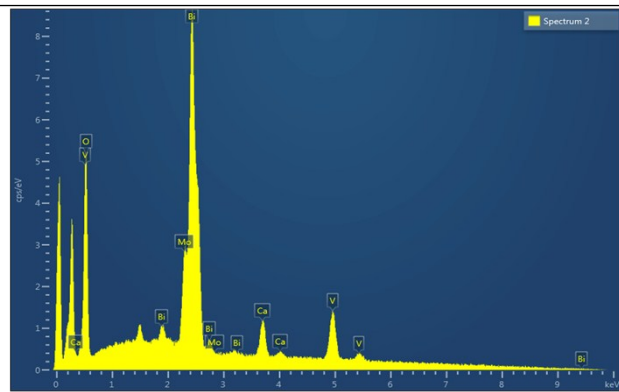

| <b>SBVM3</b> |              |              |              |              |
|--------------|--------------|--------------|--------------|--------------|
|              | Found        |              | Calculated   |              |
|              | <i>Wt. %</i> | <i>At. %</i> | <i>Wt. %</i> | <i>At. %</i> |
| <b>Bi</b>    | 54.11        | 14.3         | 48.6         | 13.33        |
| <b>Mo</b>    | 9.06         | 5.2          | 9.56         | 3.34         |
| <b>V</b>     | 11.96        | 13.0         | 11.85        | 13.33        |
| <b>Sr</b>    | 6.55         | 4.1          | 8.73         | 3.34         |
| <b>O</b>     | 18.32        | 63.4         | 21.26        | 66.66        |

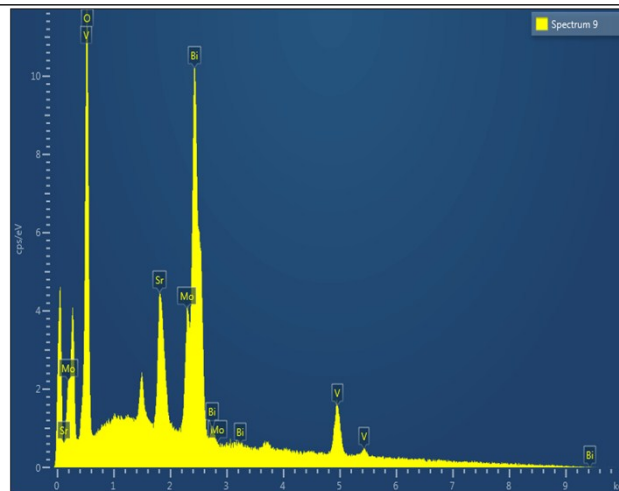

| <b>CBVM5</b> |              |              |              |              |
|--------------|--------------|--------------|--------------|--------------|
|              | Found        |              | Calculated   |              |
|              | <i>Wt. %</i> | <i>At. %</i> | <i>Wt. %</i> | <i>At. %</i> |
| <b>Bi</b>    | 42.59        | 9.8          | 39.89        | 8.34         |
| <b>Mo</b>    | 20.61        | 10.3         | 18.31        | 8.33         |
| <b>V</b>     | 9.44         | 8.9          | 9.72         | 8.34         |
| <b>Ca</b>    | 6.20         | 7.4          | 7.65         | 8.33         |
| <b>O</b>     | 21.16        | 63.6         | 24.43        | 66.66        |

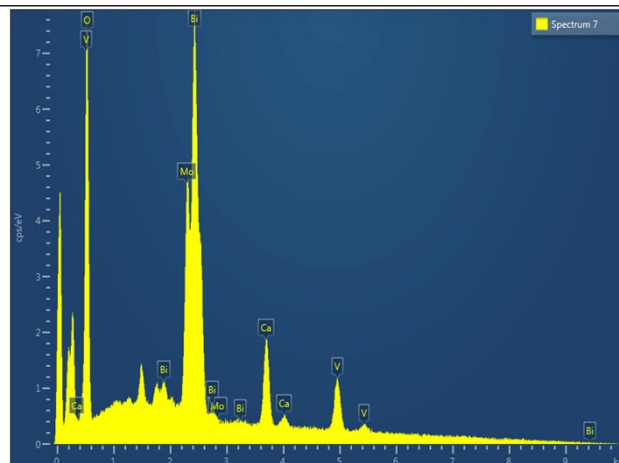

| <b>SBVM5</b> |              |              |              |              |
|--------------|--------------|--------------|--------------|--------------|
|              | Found        |              | Calculated   |              |
|              | <i>Wt. %</i> | <i>At. %</i> | <i>Wt. %</i> | <i>At. %</i> |
| <b>Bi</b>    | 38.45        | 9.5          | 36.57        | 8.34         |
| <b>Mo</b>    | 18.38        | 9.9          | 16.79        | 8.33         |
| <b>V</b>     | 9.68         | 9.8          | 8.91         | 8.34         |
| <b>Sr</b>    | 14.13        | 8.3          | 15.33        | 8.33         |
| <b>O</b>     | 19.36        | 62.6         | 22.4         | 66.66        |

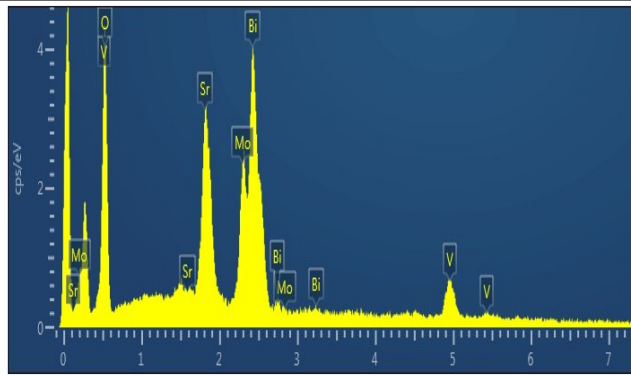

| <b>CBVM7</b> |              |              |              |              |
|--------------|--------------|--------------|--------------|--------------|
|              | Found        |              | Calculated   |              |
|              | <i>Wt. %</i> | <i>At. %</i> | <i>Wt. %</i> | <i>At. %</i> |
| <b>Bi</b>    | 33.86        | 7.3          | 26.43        | 5.0          |
| <b>Mo</b>    | 27.75        | 13.0         | 28.32        | 11.67        |
| <b>V</b>     | 5.77         | 5.1          | 6.44         | 5.0          |
| <b>Ca</b>    | 10.18        | 11.4         | 11.83        | 11.67        |
|              | 22.44        | 63.2         | 26.98        | 66.66        |

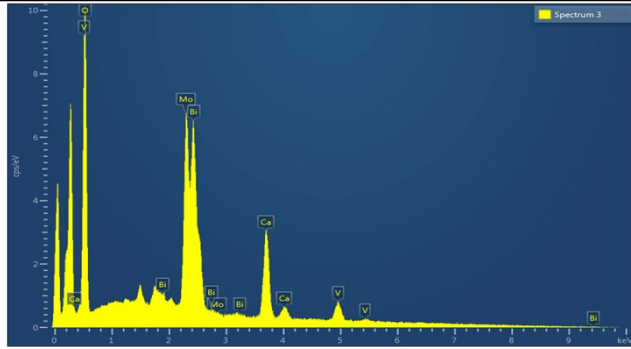

| <b>SBVM7</b> |              |              |              |              |
|--------------|--------------|--------------|--------------|--------------|
|              | Found        |              | Calculated   |              |
|              | <i>Wt. %</i> | <i>At. %</i> | <i>Wt. %</i> | <i>At. %</i> |
| <b>Bi</b>    | 27.35        | 6.4          | 23.18        | 5.0          |
| <b>Mo</b>    | 23.79        | 12.1         | 24.83        | 11.67        |
| <b>V</b>     | 6.19         | 5.9          | 5.65         | 5.0          |
| <b>Sr</b>    | 21.92        | 12.2         | 22.68        | 11.67        |
| <b>O</b>     | 20.75        | 63.4         | 23.66        | 66.66        |

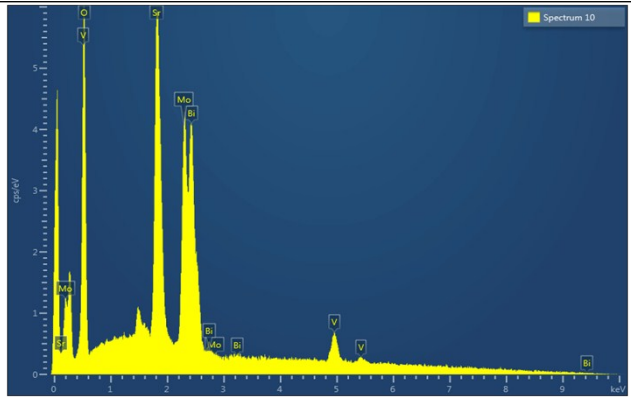

| <b>CBVM8</b> |              |              |              |              |
|--------------|--------------|--------------|--------------|--------------|
|              | Found        |              | Calculated   |              |
|              | <i>Wt. %</i> | <i>At. %</i> | <i>Wt. %</i> | <i>At. %</i> |
| <b>Bi</b>    | 20.40        | 3.8          | 18.59        | 3.34         |
| <b>Mo</b>    | 34.28        | 13.9         | 34.15        | 13.33        |
| <b>V</b>     | 3.82         | 2.9          | 4.53         | 3.34         |
| <b>Ca</b>    | 14.89        | 14.5         | 14.26        | 13.33        |
| <b>O</b>     | 26.61        | 64.9         | 28.47        | 66.66        |

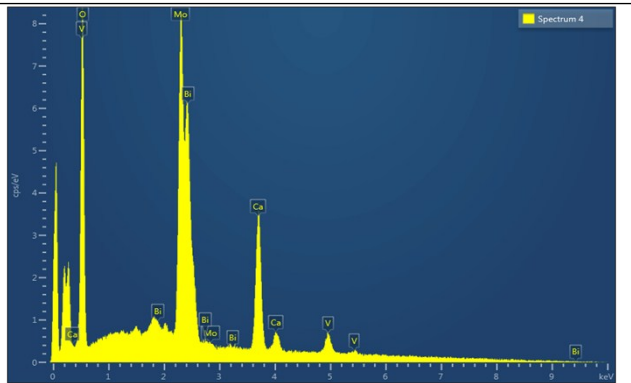



| <b>SBVM8</b> |              |              |              |              |
|--------------|--------------|--------------|--------------|--------------|
|              | Found        |              | Calculated   |              |
|              | <i>Wt. %</i> | <i>At. %</i> | <i>Wt. %</i> | <i>At. %</i> |
| <b>Bi</b>    | 12.53        | 2.7          | 15.90        | 3.34         |
| <b>Mo</b>    | 33.0         | 15.5         | 29.21        | 13.33        |
| <b>V</b>     | 3.43         | 3.0          | 3.87         | 3.34         |
| <b>Sr</b>    | 28.31        | 14.6         | 26.67        | 13.33        |
| <b>O</b>     | 22.73        | 64.2         | 24.35        | 66.66        |

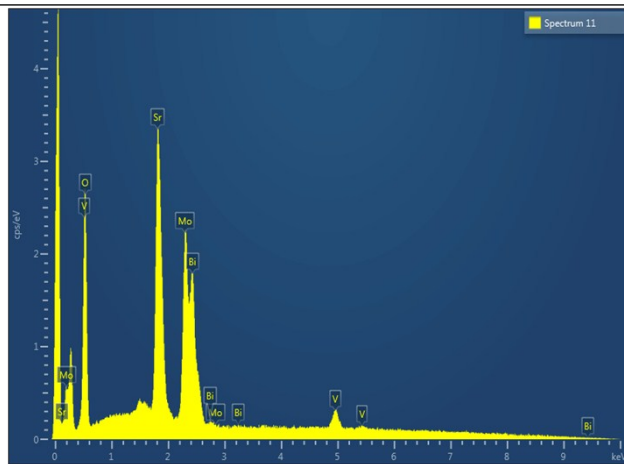

| <b>CBVM9</b> |              |              |              |              |
|--------------|--------------|--------------|--------------|--------------|
|              | Found        |              | Calculated   |              |
|              | <i>Wt. %</i> | <i>At. %</i> | <i>Wt. %</i> | <i>At. %</i> |
| <b>Bi</b>    | 11.98        | 2.2          | 9.84         | 1.67         |
| <b>Mo</b>    | 42.10        | 16.8         | 40.65        | 15.0         |
| <b>V</b>     | 2.01         | 1.5          | 2.4          | 1.67         |
| <b>Ca</b>    | 17.90        | 17.1         | 16.98        | 15.0         |
| <b>O</b>     | 26.01        | 62.4         | 30.13        | 66.66        |

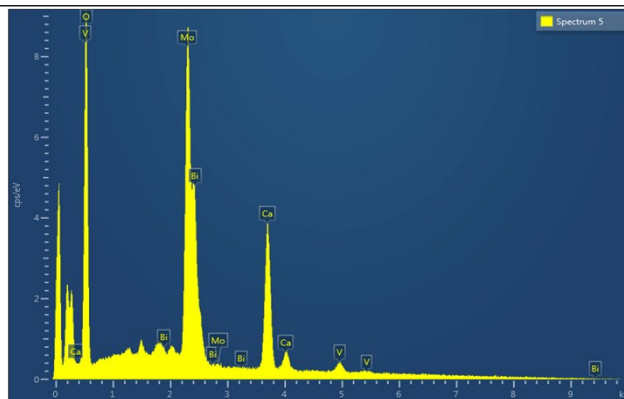

| <b>SBVM9</b> |              |              |              |              |
|--------------|--------------|--------------|--------------|--------------|
|              | Found        |              | Calculated   |              |
|              | <i>Wt. %</i> | <i>At. %</i> | <i>Wt. %</i> | <i>At. %</i> |
| <b>Bi</b>    | 6.06         | 1.3          | 8.19         | 1.67         |
| <b>Mo</b>    | 35.64        | 16.6         | 33.84        | 15.0         |
| <b>V</b>     | 1.18         | 1.0          | 2.0          | 1.67         |
| <b>Sr</b>    | 34.42        | 17.6         | 30.9         | 15.0         |
| <b>O</b>     | 22.69        | 63.5         | 25.07        | 66.66        |

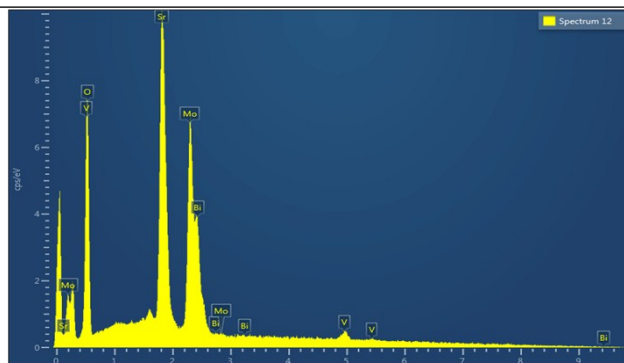



**Table S4** Lattice Parameters ( $\text{\AA}$  or  $\text{\AA}^3$ ) and calculated  $E_g$  values of  $M^{II}_{1-x}Bi_xV_xMo_{1-x}O_4$  ( $x=0-1$ ) Solid Solutions

| Formula                              | Abr.  | a                        | c                           | V          | $E_g$ |
|--------------------------------------|-------|--------------------------|-----------------------------|------------|-------|
| $BiVO_4^*$                           | -     | $a= 5.197$<br>$b= 5.096$ | $c=11.702$<br>$\beta= 90.4$ | 309.9      | 2.34  |
| $Ca_{0.1}Bi_{0.9}V_{0.9}Mo_{0.1}O_4$ | CBVM1 | 5.1433(2)                | 11.6733(1)                  | 308.81(3)  | 2.47  |
| $Ca_{0.2}Bi_{0.8}V_{0.8}Mo_{0.2}O_4$ | CBVM2 | 5.1553(1)                | 11.6512(2)                  | 309.84(1)  | 2.50  |
| $Ca_{0.3}Bi_{0.7}V_{0.7}Mo_{0.3}O_4$ | CBVM2 | 5.1603(3)                | 11.1651(1)                  | 310.43(3)  | 2.51  |
| $Ca_{0.5}Bi_{0.5}V_{0.5}Mo_{0.5}O_4$ | CBVM5 | 5.2065(1)                | 11.1451(1)                  | 310.96(2)  | 2.72  |
| $Ca_{0.7}Bi_{0.3}V_{0.3}Mo_{0.7}O_4$ | CBVM7 | 5.2231(1)                | 11.4237(2)                  | 311.61(1)  | 3.08  |
| $CaMoO_4$ [19]                       | -     | 5.3255                   | 11.4298                     | 331.8      | 3.64  |
| $Sr_{0.1}Bi_{0.9}V_{0.9}Mo_{0.1}O_4$ | SBVM1 | 5.16087(4)               | 11.7229(1)                  | 313.18(3)  | 2.35  |
| $Sr_{0.2}Bi_{0.8}V_{0.8}Mo_{0.2}O_4$ | SBVM1 | 5.1882(1)                | 11.7713(3)                  | 316.85(2)  | 2.58  |
| $Sr_{0.3}Bi_{0.7}V_{0.7}Mo_{0.3}O_4$ | SBVM1 | 5.2154(2)                | 11.8172(1)                  | 321.44(2)  | 2.61  |
| $Sr_{0.5}Bi_{0.5}V_{0.5}Mo_{0.5}O_4$ | SBVM1 | 5.2691(3)                | 11.8926(2)                  | 330.182(1) | 2.81  |
| $Sr_{0.7}Bi_{0.3}V_{0.3}Mo_{0.7}O_4$ | SBVM1 | 5.3204(1)                | 11.9557(1)                  | 338.43(2)  | 2.95  |
| $Sr_{0.8}Bi_{0.2}V_{0.2}Mo_{0.8}O_4$ | SBVM1 | 5.3473(4)                | 11.98(2)                    | 342.67(2)  | 3.12  |
| $Sr_{0.9}Bi_{0.1}V_{0.1}Mo_{0.9}O_4$ | SBVM1 | 5.3696(1)                | 11.99(1)                    | 345.82(4)  | 3.28  |
| $SrMoO_4$ [30]                       | -     | 5.222(1)                 | 11.425(3)                   | 332.1      | 4.06  |

\* $BiVO_4$  is indexed in monoclinic crystal system<sup>19</sup>

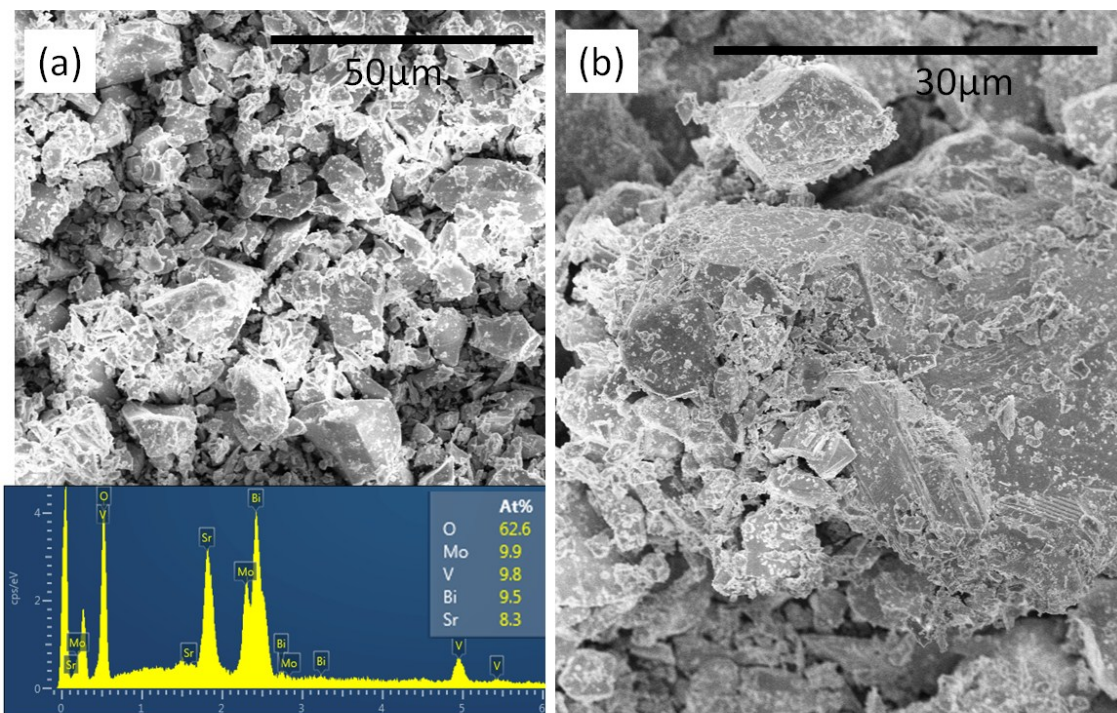

**Fig. S3** SEM images of (a) SBVM5 powder (the insert is the associated EDS) and  $\text{BiVO}_4$  prepared under the same conditions (b).

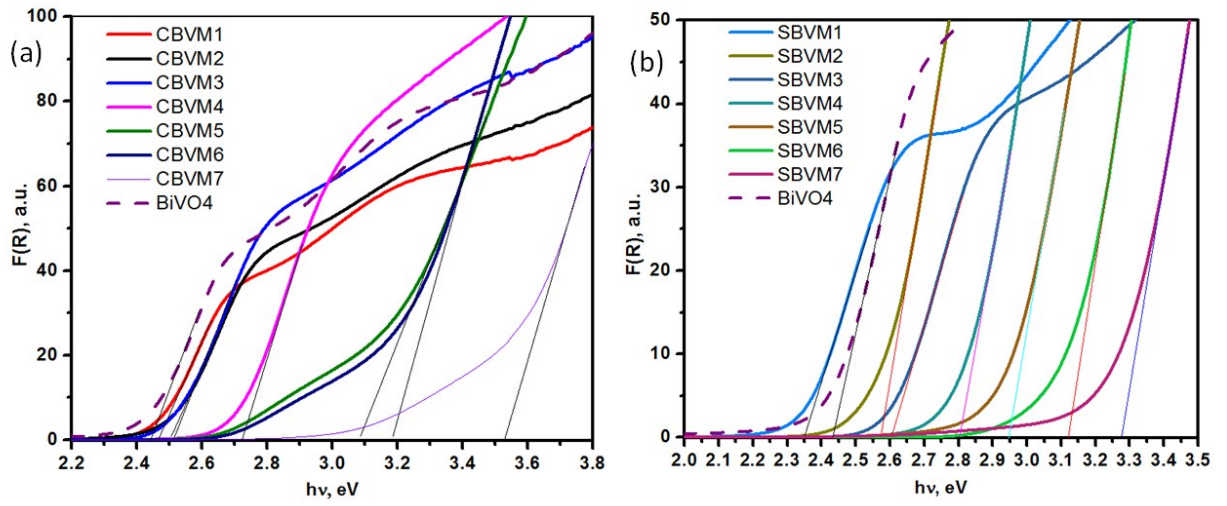

**Fig. S4** Determination of bandgap values for pure  $\text{BiVO}_4$  and  $\text{M}^{\text{II}}_{1-x}\text{Bi}_x\text{V}_x\text{Mo}_{1-x}\text{O}_4$  ( $x=0-1$ ) solid solutions calculated using Kubelka –Munk function.

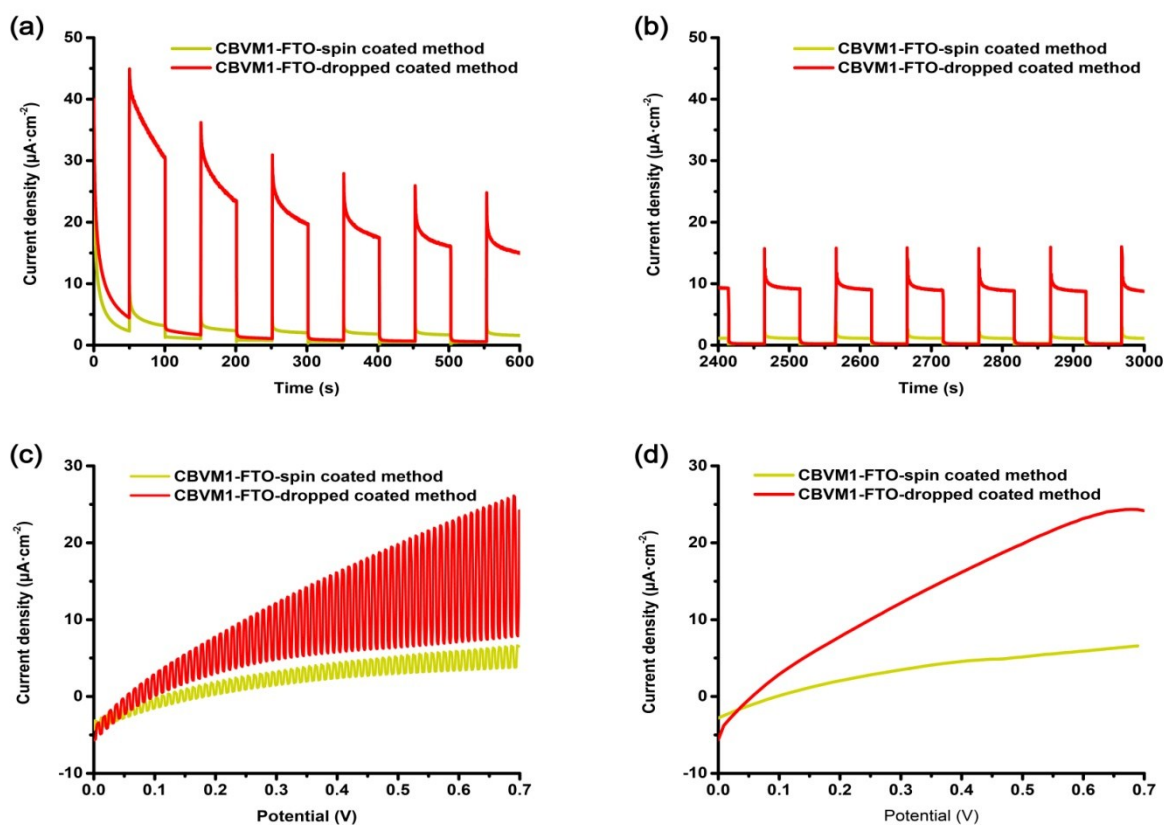

**Fig. S5** Comparative testing of CBVM1-FTO performance prepared by different methods.

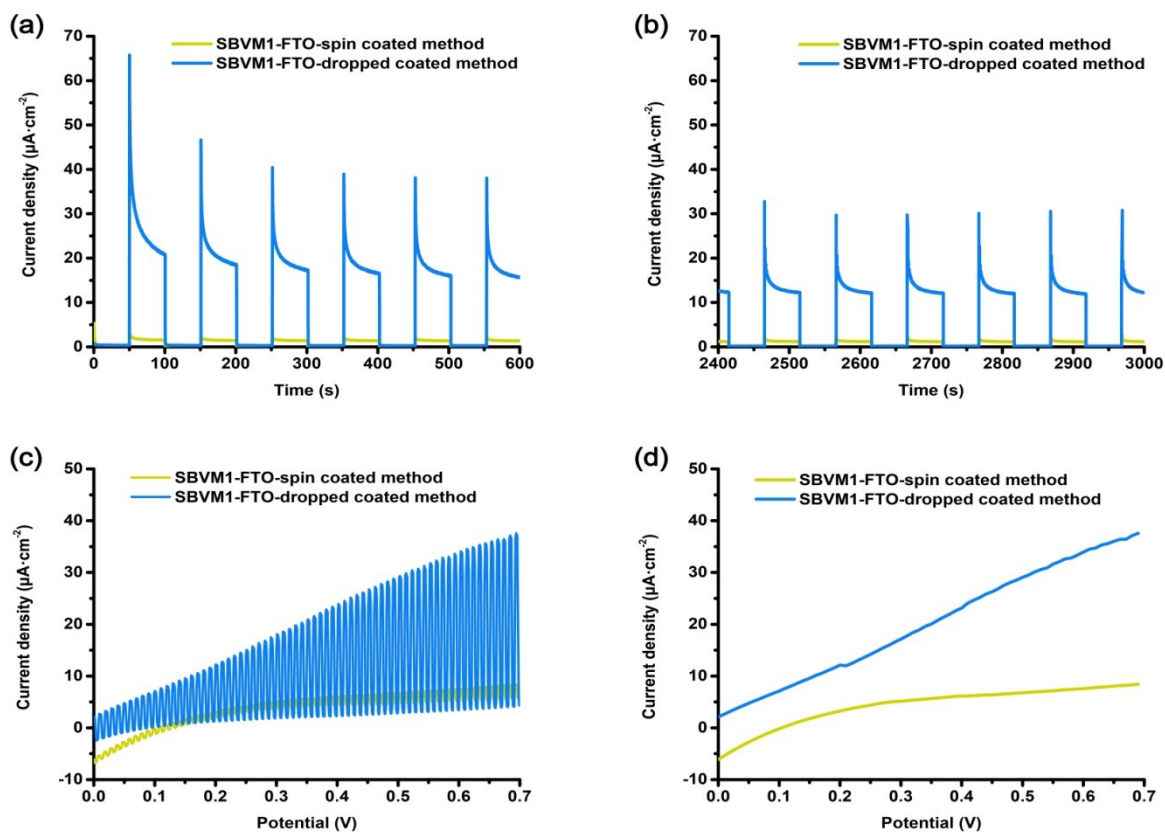

**Fig. S6** Comparative testing of SBVM1-FTO performance prepared by different methods.



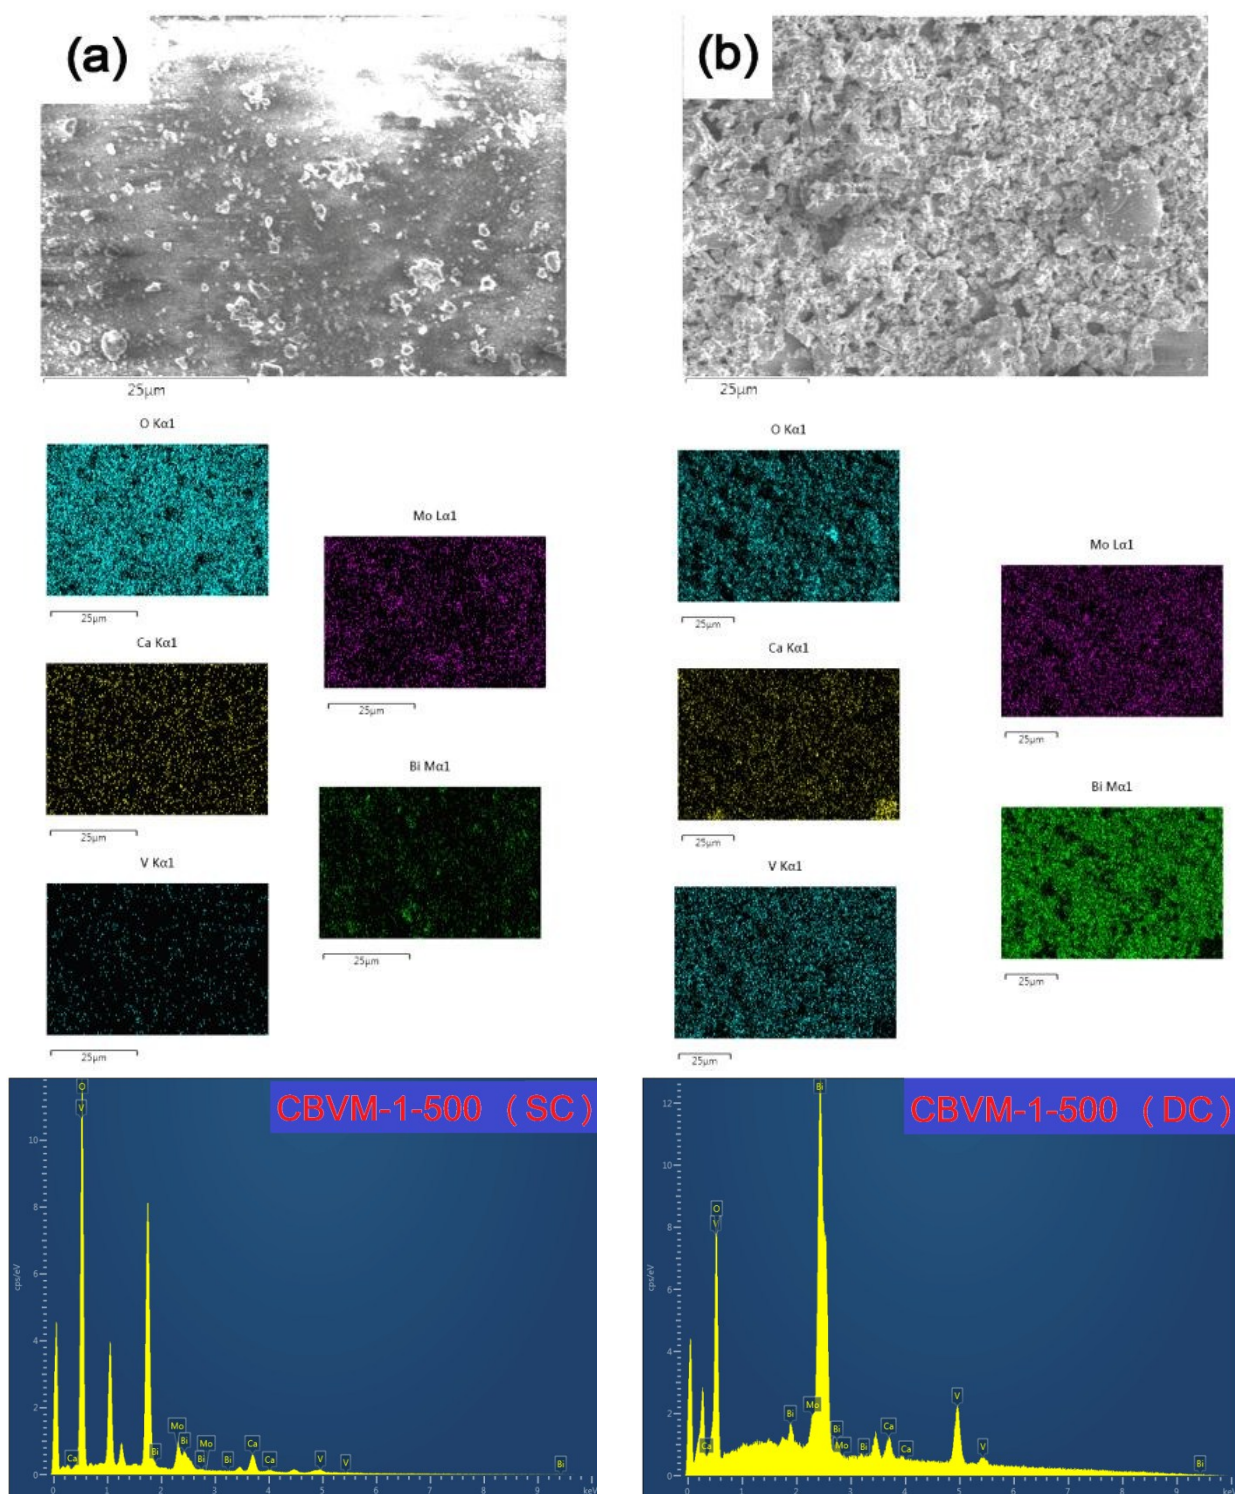

**Fig. S7** SEM image and EDX mapping for CBVM-1 sample on the FTO surface prepared by spin-coating (a) and dropped-coating (b) methods after annealing at 500°C.

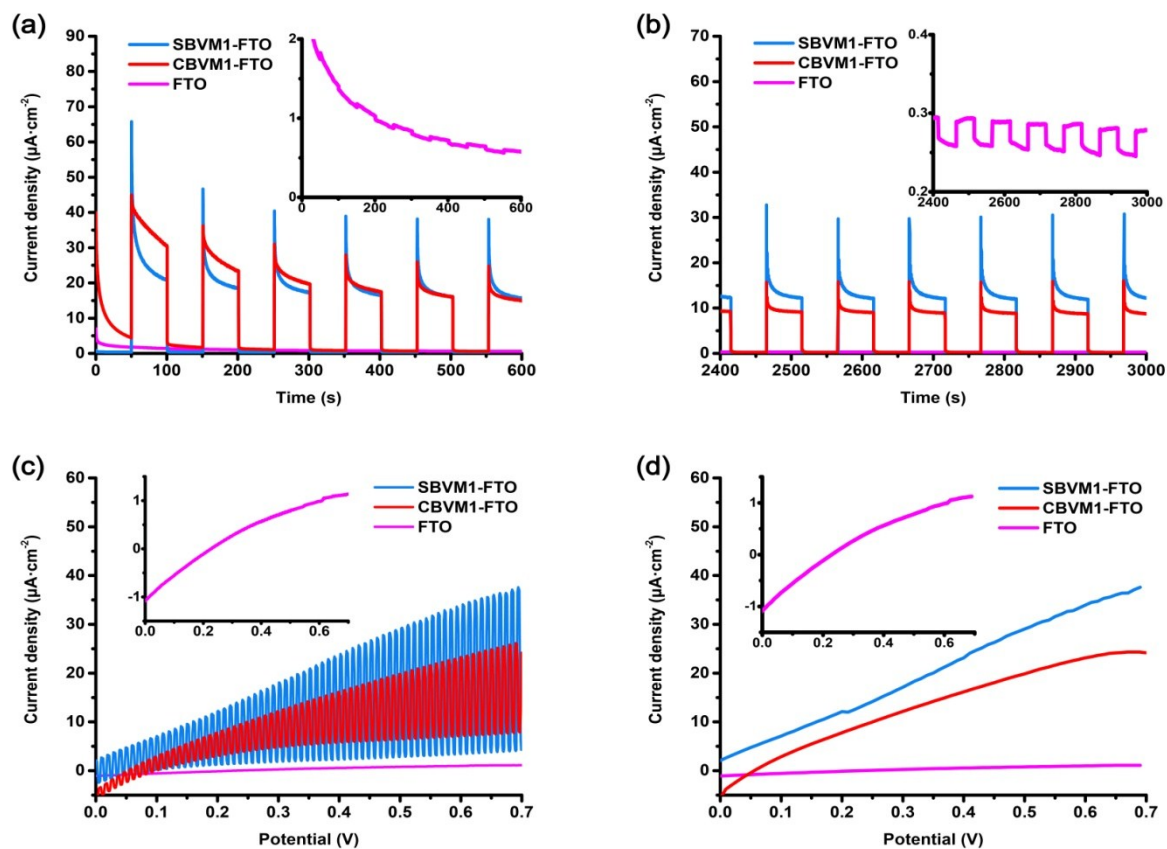

**Fig. S8** The results of I-t tests and photocurrent – potential curves for FTO.

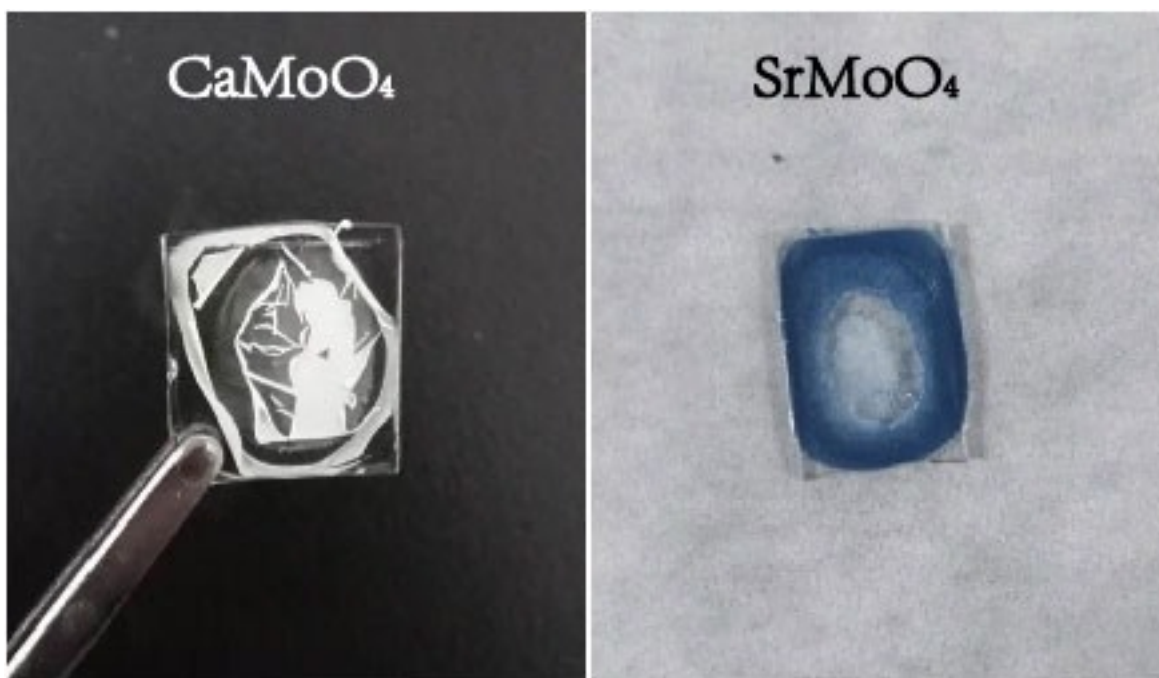

**Fig. S9** Exfoliation of  $\text{CaMoO}_4$ -Nafion film from FTO surface and the view of the  $\text{SrMoO}_4$ -FTO electrode dried at  $60^\circ\text{C}$ .

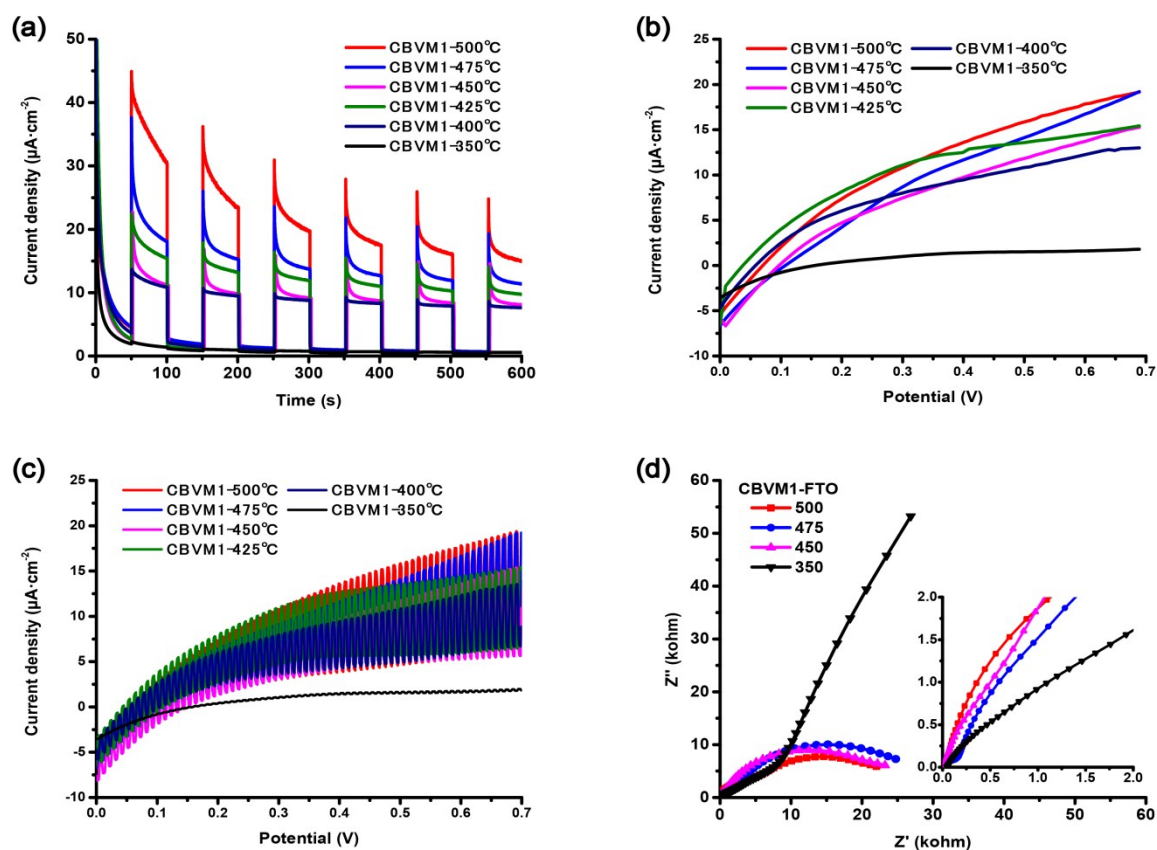

**Fig. S10** Comparative testing of CBVM1-FTO performance after final annealing at different temperatures (a) photocurrent–time curves; (b) photocurrent–potential curves; (c) dependencies photocurrent–potential, that show the change in LSV values (d) the results of EIS spectroscopy ( the insert – a high-frequency region of the spectra). All measurements have been taken in 0.5 M Na<sub>2</sub>SO<sub>4</sub> solution. The chopped light with power of 100 mW·cm<sup>-2</sup>.



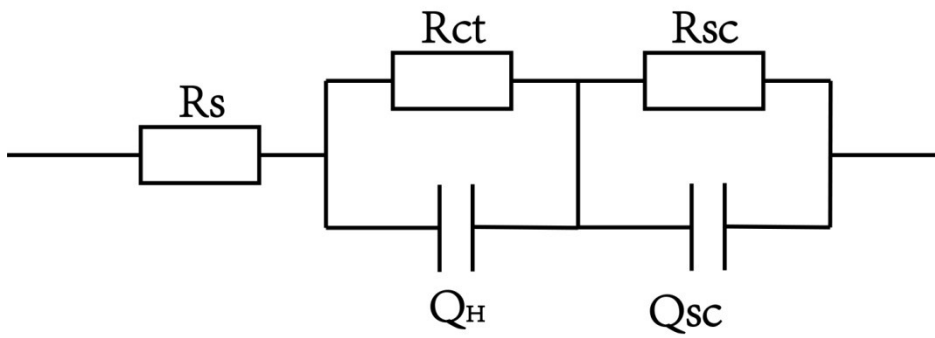

**Fig. S11** The equivalent scheme for EIS measurement:  $R_s$  – solution resistance,  $R_{ct}$  – the resistance of electron transfer on a photoanode;  $Q_H$  – constant phase element (CPE), represents Helmholtz layer capacitance;  $Q_{sc}$  – constant phase element (CPE), represents space charge layer capacitance;  $R_{sc}$  is the space charge separation resistance  $Q$  is the constant phase element (CPE). Since the charge transport and transfer process is considered to be normally much faster in the bulk than that in the semiconductor-electrolyte interface, the low frequency response has been assigned to the semiconductor-electrolyte charge transfer behavior ( $R_{ct}$  and  $Q_H$ ) while the high frequency response has been designated to the behavior in the semiconductor bulk ( $R_{sc}$  and  $Q_{sc}$ ) correspondingly.

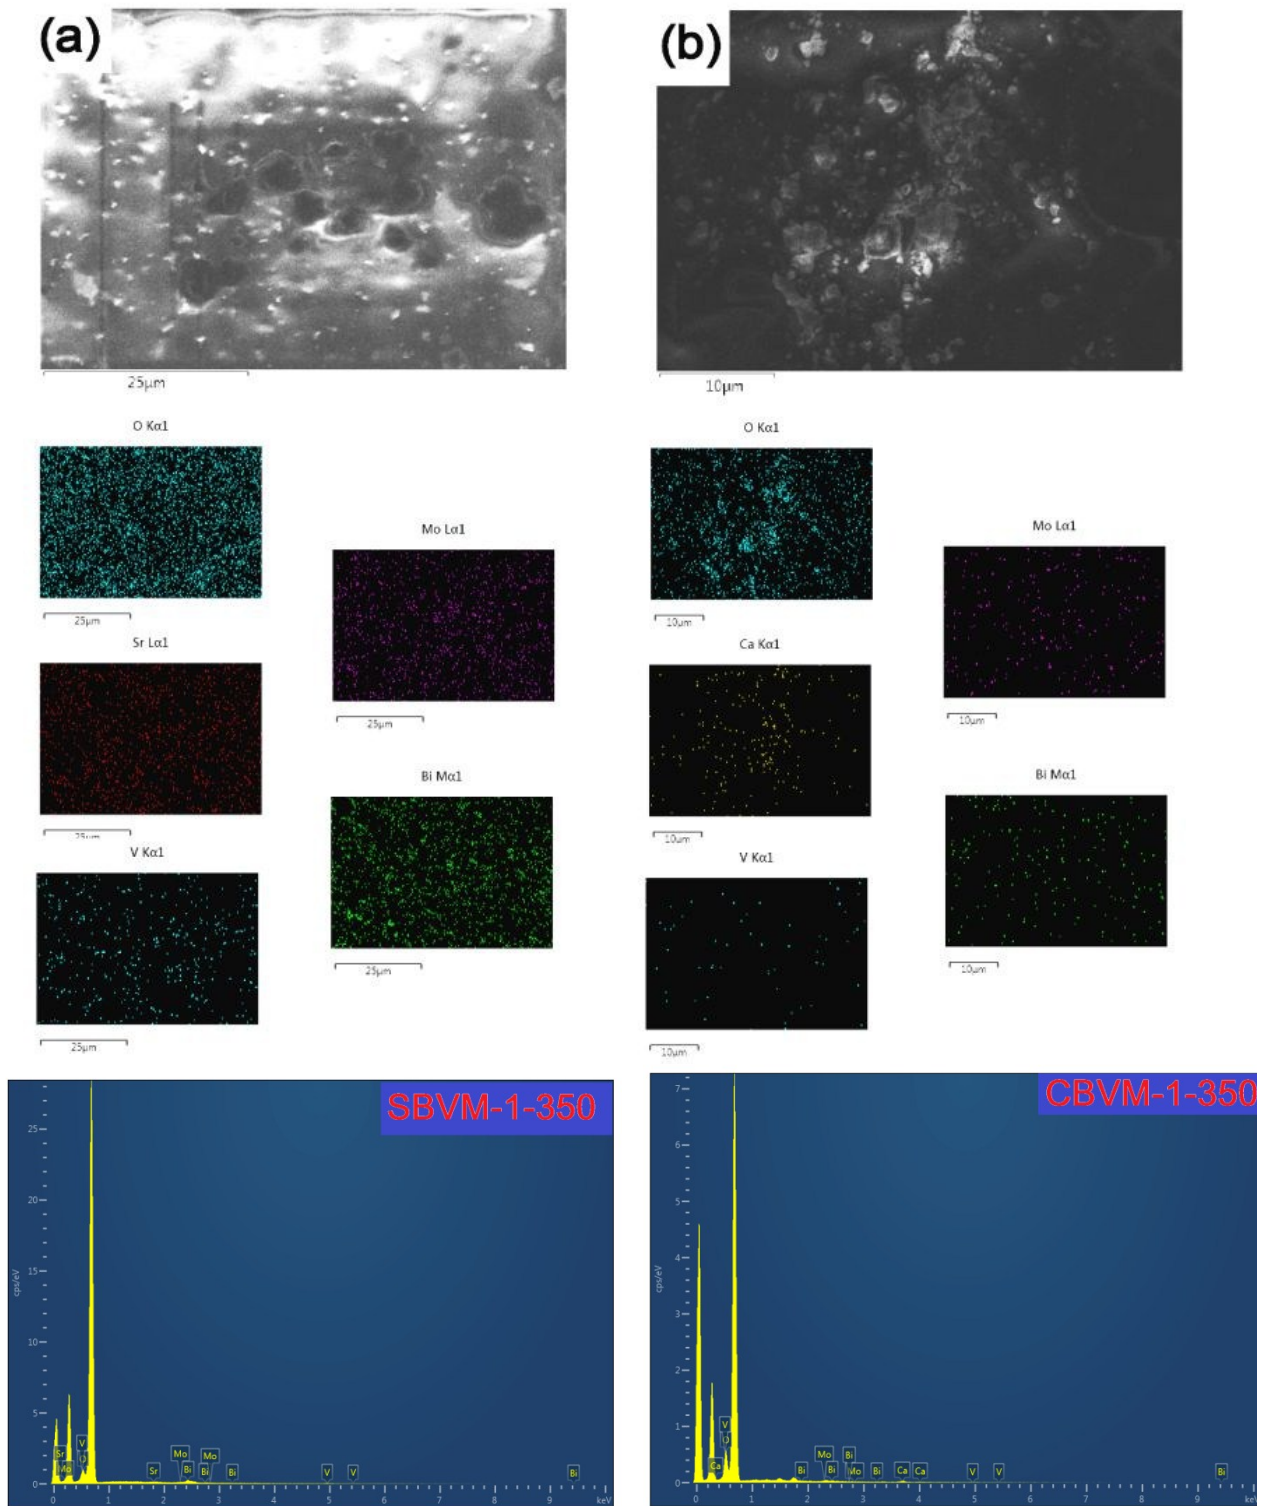

**Fig. S12** SEM images and EDX mapping for samples SBVM-1 (a) and CBVM-1 (b) on the FTO surface after annealing at 350°C.

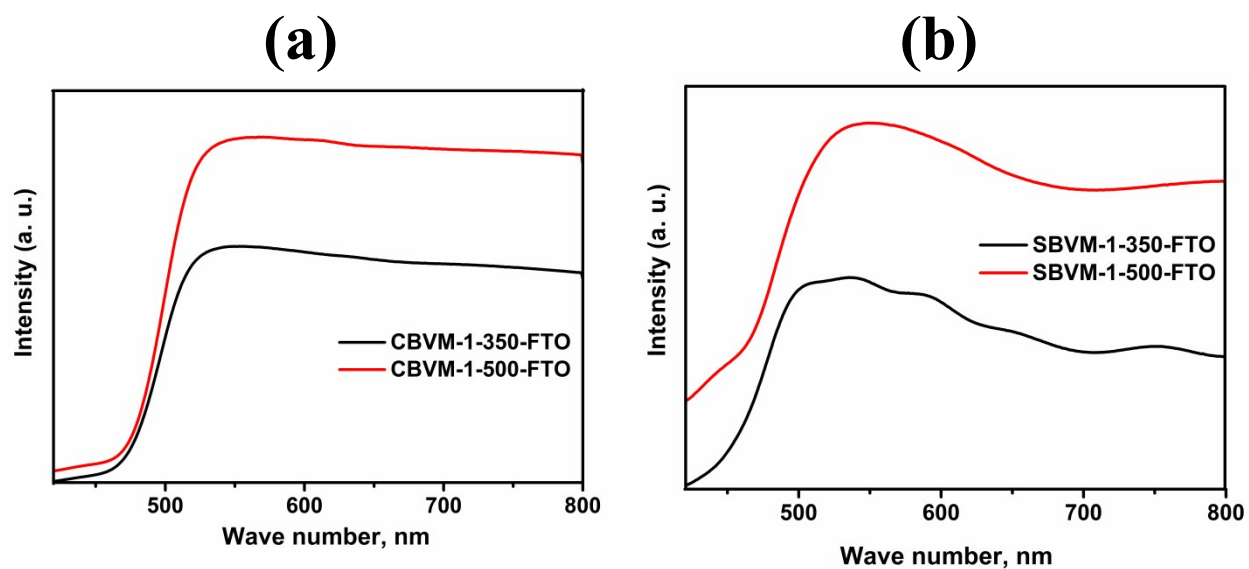

**Fig. S13** UV-Vis diffuse reflectance spectra for electrodes after annealing at 350 and 500 °C: (a) CBMV-1-350-FTO and CBMV-1-500-FTO; (b) SBMV-1-350-FTO and SBMV-1-500-FTO.

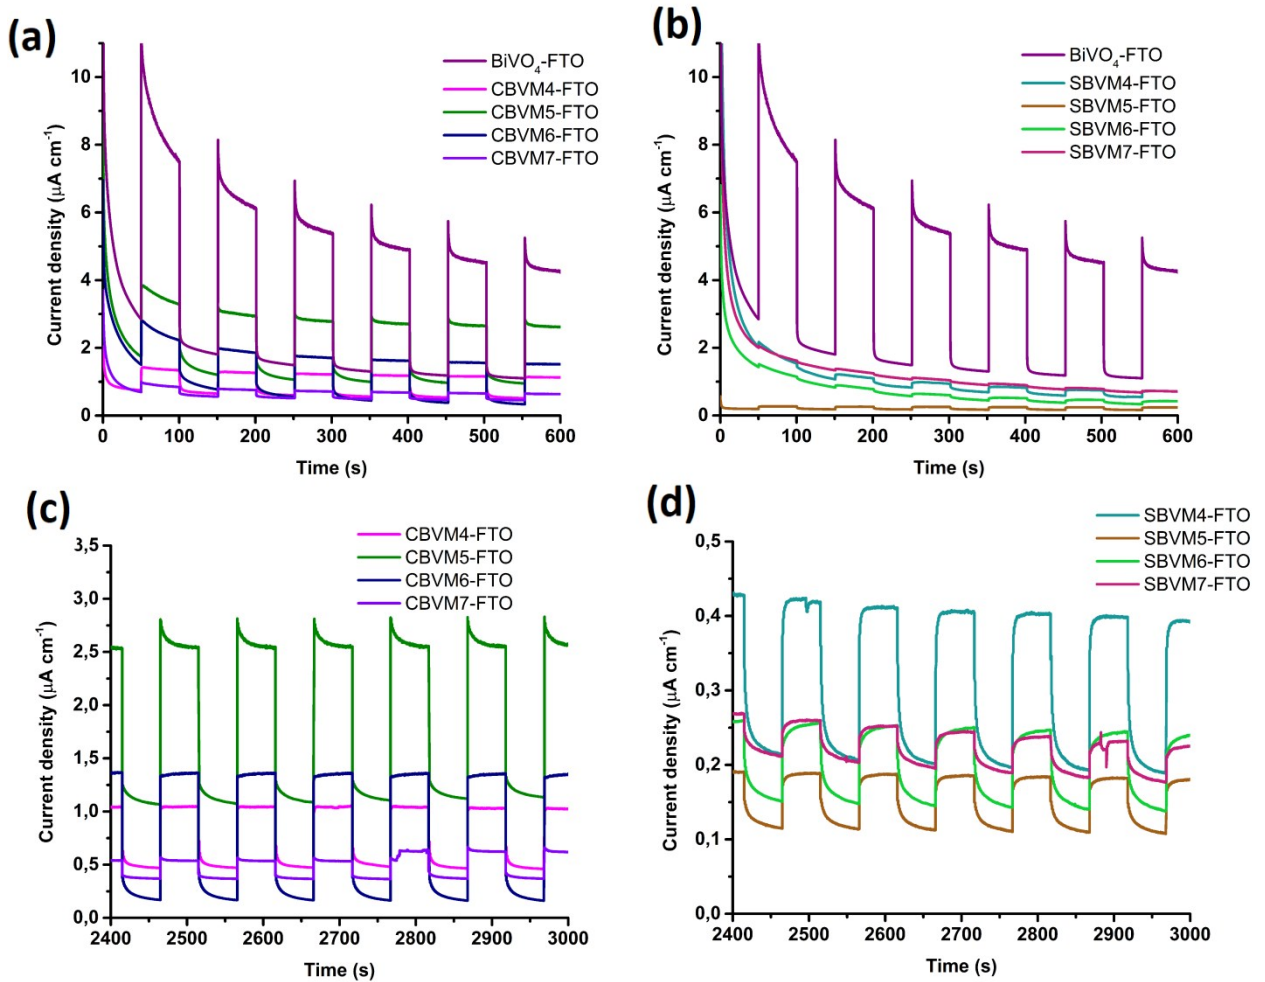

**Fig. S14** The results of I-t tests for electrodes based on solid solution  $\text{M}^{\text{II}}\text{Bi}_{1-x}\text{V}_{1-x}\text{Mo}_x\text{O}_4$  (where  $\text{M}^{\text{II}}$  – Ca, Sr) within the values  $x = 0.5, 0.7, 0.8$  and  $0.9$ : (a, b) after 10 min of testing and (c, d) after photocurrent stabilization CBVM(4-7)-FTO, SBVM(4-7)-FTO,  $\text{BiVO}_4$ -FTO.

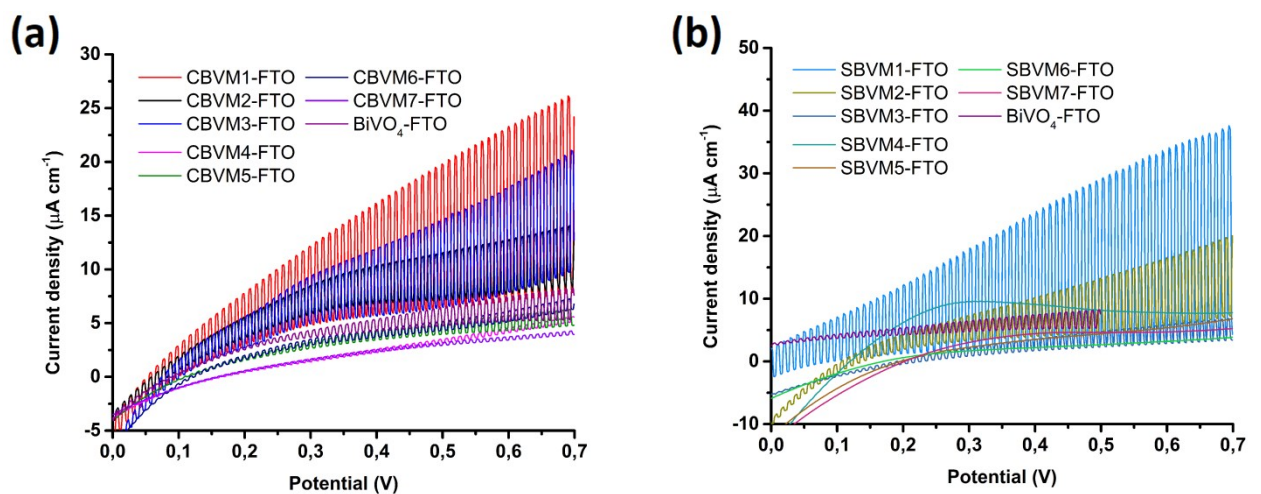

**Fig. S15** Photocurrent – potential curves for CBVM-FTO (a) and SBVM-FTO (b) photoanodes.
